# Supplementary material
Source: PubMed Central journal article supplement (PMC3151695)
Supplement: supp_P008755_jlr.P008755-1.pdf [file supp_P008755_jlr.P008755-1.pdf]

**Supplemental Table 1.** ORs (95% CI) of ICH according to plasma lipid tertiles after exclusion of lipid-lowering medications

| Variables        | Tertiles of plasma lipid |                 |                 |                      |                      |
|------------------|--------------------------|-----------------|-----------------|----------------------|----------------------|
|                  | Tertile-3                | Tertile-2       | Tertile-1       | P <sup>a</sup> value | P <sup>b</sup> value |
| LDL-C (mmol/L)   | ≥3.20                    | 2.61–3.19       | <2.61           |                      |                      |
| ICH ( <i>n</i> ) | 56                       | 45              | 40              | —                    | —                    |
| Unadjusted       | 1.0                      | 0.77(0.52–1.15) | 0.65(0.43–0.98) | 0.20                 | 0.04                 |
| Model 1          | 1.0                      | 0.76(0.50–1.13) | 0.62(0.41–0.95) | 0.18                 | 0.03                 |
| Model 2          | 1.0                      | 0.80(0.52–1.21) | 0.68(0.43–1.08) | 0.29                 | 0.10                 |
| HDL-C (mmol/L)   | ≥1.65                    | 1.38–1.64       | <1.38           |                      |                      |
| ICH ( <i>n</i> ) | 33                       | 40              | 68              | —                    | —                    |
| Unadjusted       | 1.0                      | 1.24(0.78–1.97) | 2.15(1.41–3.27) | 0.37                 | <0.01                |
| Model 1          | 1.0                      | 1.20(0.75–1.92) | 2.06(1.34–3.16) | 0.45                 | <0.01                |
| Model 2          | 1.0                      | 1.18(0.72–1.94) | 2.38(1.51–3.76) | 0.52                 | <0.01                |
| TC (mmol/L)      | ≥5.77                    | 4.87–5.76       | <4.87           |                      |                      |
| ICH ( <i>n</i> ) | 46                       | 50              | 45              | —                    | —                    |
| Unadjusted       | 1.0                      | 1.06(0.71–1.59) | 0.92(0.61–1.39) | 0.77                 | 0.69                 |
| Model 1          | 1.0                      | 1.07(0.71–1.61) | 0.86(0.56–1.33) | 0.76                 | 0.50                 |
| Model 2          | 1.0                      | 1.11(0.72–1.70) | 1.03(0.65–1.61) | 0.65                 | 0.91                 |
| TG (mmol/L)      | ≥1.24                    | 1.03–1.23       | <1.03           |                      |                      |
| ICH ( <i>n</i> ) | 47                       | 50              | 44              | —                    | —                    |
| Unadjusted       | 1.0                      | 1.03(0.69–1.55) | 0.86(0.57–1.30) | 0.88                 | 0.47                 |
| Model 1          | 1.0                      | 0.92(0.61–1.39) | 0.79(0.51–1.20) | 0.68                 | 0.79                 |
| Model 2          | 1.0                      | 0.86(0.55–1.34) | 0.78(0.48–1.26) | 0.51                 | 0.31                 |

P<sup>a</sup> values were calculated using the multivariable logistic regression model and compared Tertile-2 with Tertile-3; P<sup>b</sup> values compared Tertile-1 with Tertile-3.

Model 1 was used to adjust for age and gender in the logistic regression analysis.

Model 2 was used to adjust for age, gender and other vascular risk factors including SBP, BMI, hypercholesterolemia, current smoking, current drinking, and family history of stroke.

OR indicates odds ratio; 95% CI, 95% confidence interval; ICH, intracerebral hemorrhage; LDL-C, low-density lipoprotein cholesterol; HDL-C, high-density lipoprotein cholesterol; TC, total cholesterol; TG, triglycerides; SBP, systolic blood pressure; BMI, body mass index.
